# Supplementary material for: XIAP-mediated degradation of IFT88 disrupts HSC cilia to stimulate HSC activation and liver fibrosis
Source: PubMed Central journal article supplement (PMC10933415; doi:10.1038/s44319-024-00092-y), 2024-02-13
Supplement: 44319_2024_92_MOESM1_ESM.pdf [file 44319_2024_92_MOESM1_ESM.pdf]

## Table of Content

|                    |                                                                    |        |
|--------------------|--------------------------------------------------------------------|--------|
| Appendix Figure S1 | Mass spectrometric identification of IFT88-interacting proteins.   | Page 2 |
| Appendix Figure S2 | IFT88 interacts with the E3 ubiquitin ligase XIAP in HEK293 cells. | Page 3 |
| Appendix Figure S3 | XIAP mediates IFT88 ubiquitination in HEK293 cells.                | Page 4 |

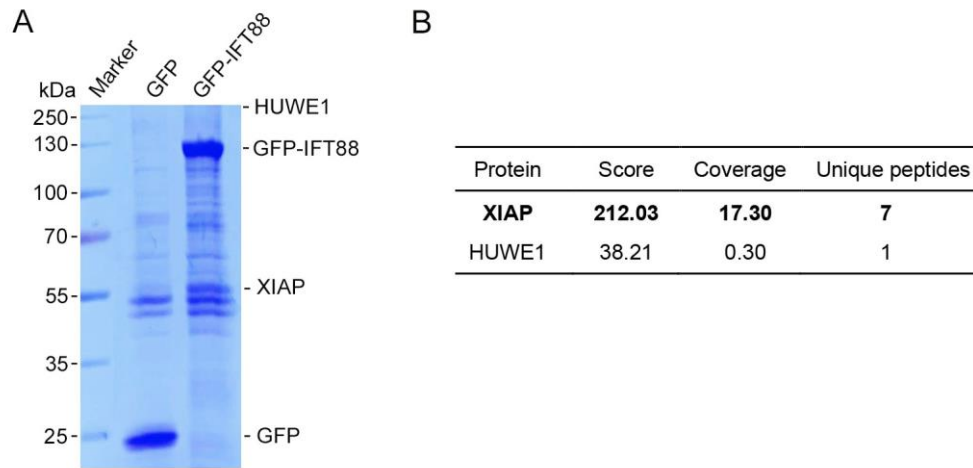

**Appendix Figure S1. Mass spectrometric identification of IFT88-interacting proteins.**

A. Coomassie blue staining of proteins immunoprecipitated from LX-2 cells with anti-GFP antibody.

B. E3 ubiquitin ligases identified by mass spectrometry as IFT88-interacting proteins. Related to Fig 4.

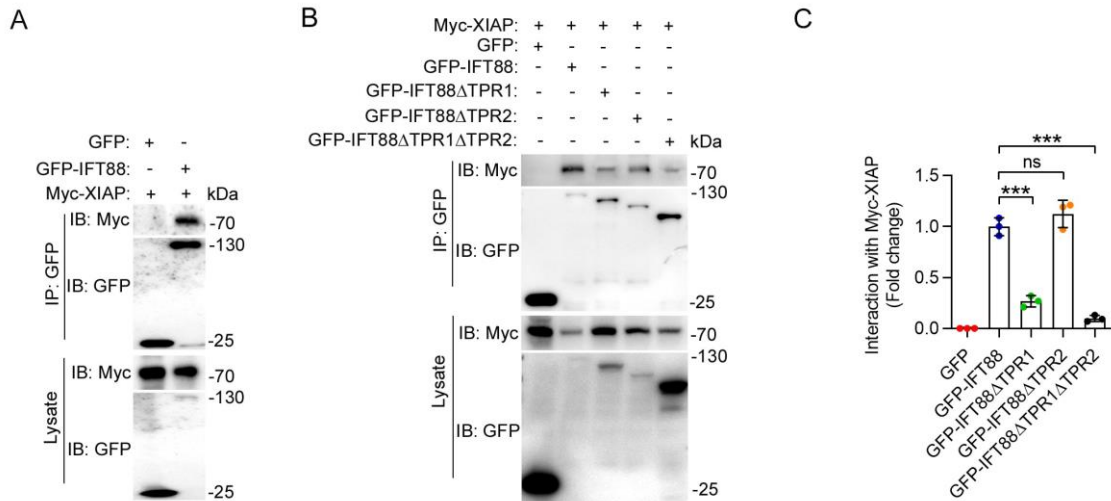

**Appendix Figure S2. IFT88 interacts with the E3 ubiquitin ligase XIAP in HEK293 cells.**

A. Analysis of IFT88 ubiquitination in HEK293 cells with or without HA-XIAP overexpression.

B, C. Examination of IFT88 ubiquitination in HEK293 cells transfected with control or XIAP siRNAs.

Data information: Data are presented as mean  $\pm$  SD. Statistical significance was determined by one-way ANOVA with post-hoc tests. ns, not significant; \*\*\* $p < 0.001$ .

Related to Fig 4.

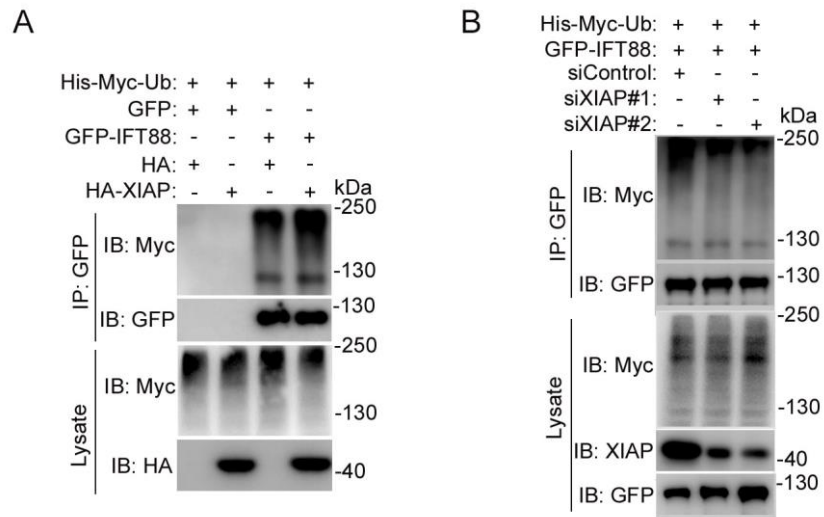

**Appendix Figure S3. XIAP mediates IFT88 ubiquitination in HEK293 cells.**

A. Analysis of IFT88 ubiquitination in HEK293 cells with or without HA-XIAP overexpression.

B. Examination of IFT88 ubiquitination in HEK293 cells transfected with control or XIAP siRNAs.

Related to Fig 5.
