# Supplementary material for: XIAP-mediated degradation of IFT88 disrupts HSC cilia to stimulate HSC activation and liver fibrosis
Source: PubMed Central journal article supplement (PMC10933415; doi:10.1038/s44319-024-00092-y), 2024-02-13
Supplement: 44319_2024_92_MOESM10_ESM.pdf [file 44319_2024_92_MOESM10_ESM.pdf]

# XIAP-mediated degradation of IFT88 disrupts HSC cilia to stimulate HSC activation and liver fibrosis

Renjie Hong, Yanjie Tan, Xiaoyu Tian, Zhenzhou Huang, Jiaying Wang, Hua Ni, Jia Yang, Weiwen Bu, Song Yang, Te Li, Fan Yu, Weilong Zhong, Tao Sun, Xiaohong Wang, Dengwen Li, Min Liu, Yunfan Yang, and Jun Zhou

DOI: [10.15252/embr.202256647](https://doi.org/10.15252/embr.202256647)

Corresponding author(s): Jun Zhou ([junzhou@nankai.edu.cn](mailto:junzhou@nankai.edu.cn)) , Yunfan Yang ([yunfanyang@sdu.edu.cn](mailto:yunfanyang@sdu.edu.cn))

---

## Review Timeline:

|                     |             |
|---------------------|-------------|
| Submission Date:    | 11th Dec 22 |
| Editorial Decision: | 25th Jan 23 |
| Revision Received:  | 23rd Oct 23 |
| Editorial Decision: | 11th Dec 23 |
| Revision Received:  | 15th Dec 23 |
| Accepted:           | 25th Jan 24 |

---

Editor: *Martina Rembold*

**Transaction Report: No Peer Review Process File is available with this article, as the authors have chosen not to make the review process public.**
